# Supplementary material for: Evolution and spread of SARS-CoV-2 likely to be affected by climate
Source: bioRxiv or medRxiv preprint supplement (doi:10.1101/2020.06.18.147074), 2021-03-22
Supplement: Supplementary file [file media-2.pdf]

## Supplementary Tables & Figures

**Table S3:** List of description & criteria of different Koppen's climate types<sup>20</sup>.

| S. No. | 1 <sup>st</sup> | 2 <sup>nd</sup> | 3 <sup>rd</sup> | Description        | Criteria                                                       |
|--------|-----------------|-----------------|-----------------|--------------------|----------------------------------------------------------------|
| 1      | A               |                 |                 | Tropical           | $T_{\text{cold}} \geq 18$                                      |
| 2      |                 | f               |                 | Rainforest         | $P_{\text{dry}} \geq 60$                                       |
| 3      |                 | m               |                 | Monsoon            | Not (Af) & $P_{\text{dry}} \geq 100\text{-MAP}/25$             |
| 4      |                 | w               |                 | Savannah           | Not (Af) & $P_{\text{dry}} < 100\text{-MAP}/25$                |
| 5      | B               |                 |                 | Arid               | $\text{MAP} < 10$ ( $P_{\text{threshold}}$ )                   |
| 6      |                 | W               |                 | Desert             | $\text{MAP} < 5$ ( $P_{\text{threshold}}$ )                    |
| 7      |                 | S               |                 | Steppe             | $\text{MAP} \geq 5$ ( $P_{\text{threshold}}$ )                 |
| 8      |                 |                 | h               | Hot                | $\text{MAT} \geq 18$                                           |
| 9      |                 |                 | k               | Cold               | $\text{MAT} < 18$                                              |
| 10     | C               |                 |                 | Temperate          | $T_{\text{hot}} > 10$ & $0 < T_{\text{cold}} < 18$             |
| 11     |                 | s               |                 | Dry summer         | $P_{\text{sdry}} < 40$ & $P_{\text{sdry}} < P_{\text{wwet}}/3$ |
| 12     |                 | w               |                 | Dry winter         | $P_{\text{wdry}} < P_{\text{swet}}/10$                         |
| 13     |                 | f               |                 | Without dry season | Not (Cs) or (Cw)                                               |
| 14     |                 |                 | a               | Hot summer         | $T_{\text{hot}} \geq 22$                                       |
| 15     |                 |                 | b               | Warm summer        | Not (a) & $T_{\text{mon}10} \geq 4$                            |
| 16     |                 |                 | c               | Cold summer        | Not (a or b) & $1 \leq T_{\text{mon}10} < 4$                   |
| 17     | D               |                 |                 | Cold               | $T_{\text{hot}} > 10$ & $T_{\text{cold}} \leq 0$               |
| 18     |                 | s               |                 | Dry summer         | $P_{\text{sdry}} < 40$ & $P_{\text{sdry}} < P_{\text{wwet}}/3$ |
| 19     |                 | w               |                 | Dry winter         | $P_{\text{wdry}} < P_{\text{swet}}/10$                         |
| 20     |                 | f               |                 | Without dry season | Not (Ds) or (Dw)                                               |
| 21     |                 |                 | a               | Hot summer         | $T_{\text{hot}} \geq 22$                                       |
| 22     |                 |                 | b               | Warm summer        | Not (a) & $T_{\text{mon}10} \geq 4$                            |
| 23     |                 |                 | c               | Cold summer        | Not (a, b or d)                                                |
| 24     |                 |                 | d               | Very cold winter   | Not (a or b) & $T_{\text{cold}} < -38$                         |
| 25     | E               |                 |                 | Polar              | $T_{\text{hot}} < 10$                                          |
| 26     |                 | T               |                 | Tundra             | $T_{\text{hot}} > 0$                                           |
| 27     |                 | F               |                 | Frost              | $T_{\text{hot}} \leq 0$                                        |

**Acronym:** MAT, mean annual temperature; MAP, mean annual precipitation;  $T_{\text{hot}}$ , temperature of hottest month;  $T_{\text{cold}}$ , temperature of coldest month;  $T_{10}$ , number of months where temperature is above 10;  $P_{\text{dry}}$ , precipitation of driest month;  $P_{\text{sdry}}$ , precipitation of driest month in summer;  $P_{\text{wdry}}$ , precipitation of driest month in winter;  $P_{\text{swet}}$ , precipitation of wettest month in summer;  $P_{\text{wet}}$ , precipitation of wettest month in winter;  $P_{\text{threshold}}$ , logical (if 70% of map occurs in winter, then  $P_{\text{threshold}} = 2(\text{MAT})$ , if 70% of map occurs in summer, then  $P_{\text{threshold}} = 2(\text{MAT})+28$ , else  $P_{\text{threshold}} = 2(\text{MAT})+14$ . Summer (winter) is defined as the warmer (cooler) six months period of ONDJFM (October-March) & AMJJAS (April-September).

18  
19

**Table S4:** List of Koppen's Symbol for each climate type<sup>20</sup>:

|                 |                                                                                  |
|-----------------|----------------------------------------------------------------------------------|
| Af              | Tropical rainforest climate                                                      |
| Am              | Tropical monsoon climate                                                         |
| <i>Aw or As</i> | Tropical wet & dry or savanna climate                                            |
| BWh             | Hot desert climate                                                               |
| BWk             | Cold desert climate                                                              |
| BSh             | Hot semi-arid climate                                                            |
| BSk             | Cold semi-arid climate                                                           |
| Cfa             | Humid subtropical climate                                                        |
| Cfb             | Temperate oceanic climate                                                        |
| Cfc             | Subpolar oceanic climate                                                         |
| Cwa             | Monsoon-influenced humid subtropical climate                                     |
| Cwb             | Subtropical highland climate or Monsoon-influenced temperate oceanic climate     |
| Cwc             | Cold subtropical highland climate or Monsoon-influenced subpolar oceanic climate |
| Csa             | Hot-summer Mediterranean climate                                                 |
| Csb             | Warm-summer Mediterranean climate                                                |
| Csc             | Cold-summer Mediterranean climate                                                |
| Dfa             | Hot-summer humid continental climate                                             |
| Dfb             | Warm-summer humid continental climate                                            |
| Dfc             | Subarctic climate                                                                |
| Dfd             | Extremely cold subarctic climate                                                 |
| Dwa             | Monsoon-influenced hot-summer humid continental climate                          |
| Dwb             | Monsoon-influenced warm-summer humid continental climate                         |
| Dwc             | Monsoon-influenced subarctic climate                                             |
| Dwd             | Monsoon-influenced extremely cold subarctic climate                              |
| Dsa             | Mediterranean-influenced hot-summer humid continental climate                    |
| Dsb             | Mediterranean-influenced warm-summer humid continental climate                   |
| Dsc             | Mediterranean-influenced subarctic climate                                       |
| Dsd             | Mediterranean-influenced extremely cold subarctic climate                        |
| ET              | Tundra climate                                                                   |
| EF              | Ice cap climate                                                                  |

20  
21  
22

23 **Table S5:** Koppen climate type & their characteristics adapted by SARS-CoV-2<sup>20</sup>.

24

| <b>Koppen Climate Type</b>     | <b>Characteristics</b>                                                                                                                                                                                                                                                                                                                      |
|--------------------------------|---------------------------------------------------------------------------------------------------------------------------------------------------------------------------------------------------------------------------------------------------------------------------------------------------------------------------------------------|
| Humid-subtropical (Cfa):       | The Koppen's symbol for the climate is 'Cfa', the 'C' of Cfa, denotes the temperature of the coldest month should be in between 0°C & 18°C, & the temperature of the hottest month is > 10°C. The 'f' is denoted for continuous rainfall throughout the year & 'a' means temperature of the hottest month temperature ≥ 22°C <sup>2</sup> . |
| Marine-temperate (Cfb):        | The 'C' & 'f' have the same definition as above, 'b' denotes hottest month's mean temperature < 22°C <sup>2</sup> .                                                                                                                                                                                                                         |
| Mediterranean (Csa-Csb):       | The 'C' has the same definition, 's' denotes dry winter, i.e., no rainfall during winters, 'a' & 'b' has similar meaning as above <sup>2</sup> .                                                                                                                                                                                            |
| Humid-continental (Dfa & Dfb): | The 'D' represents, temperature of hottest month is greater than 10°C & the temperature of the coldest month is ≤ 0°C. 'f', has similar meaning & 'a', denotes temperature of hottest month is more than 22°C while 'b' denotes temperature of hottest month is < 22°C but temperature of 10 months is ≥ 4°C <sup>2</sup> .                 |
| Tropical savannah (Aw)         | The 'Aw' climate have monthly mean temperatures above 18 °C in all months of the year with a typically a pronounced dry season, precipitation in the driest month is less than 60 mm.                                                                                                                                                       |

25 **Supplementary Figures**

26

27

28

29

30

31

32

33

34

35

36

37

38

39

40

41

42

43

44

45

46

47

48

49

(a)

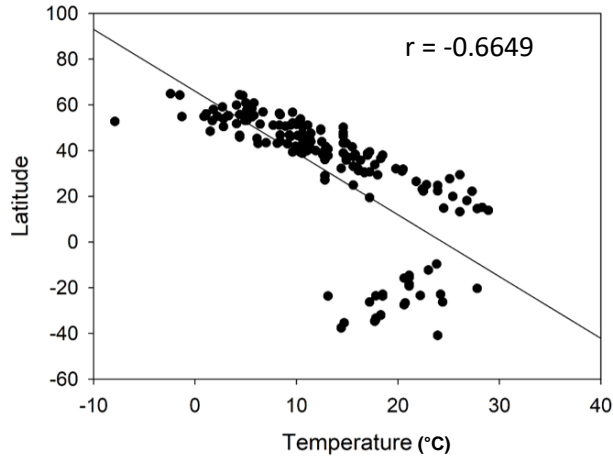

(b)

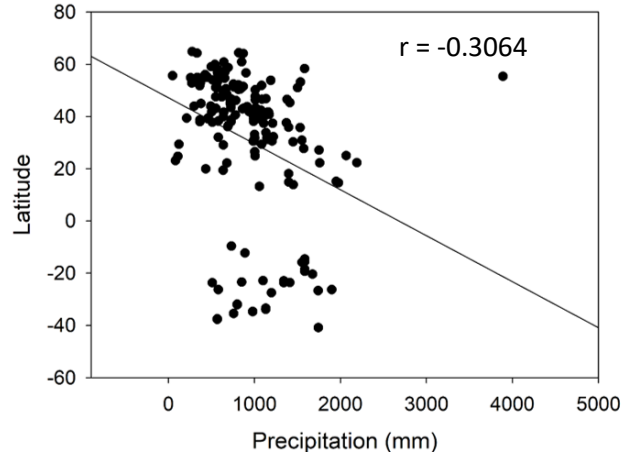

**Figure S1: Relationship between climatic variables.** Correlation between (a) latitude & temperature & (b) latitude & precipitation for SARS-CoV-2 strains (n=176) is estimated by calculating Pearson correlation coefficient (r).

50  
51  
52

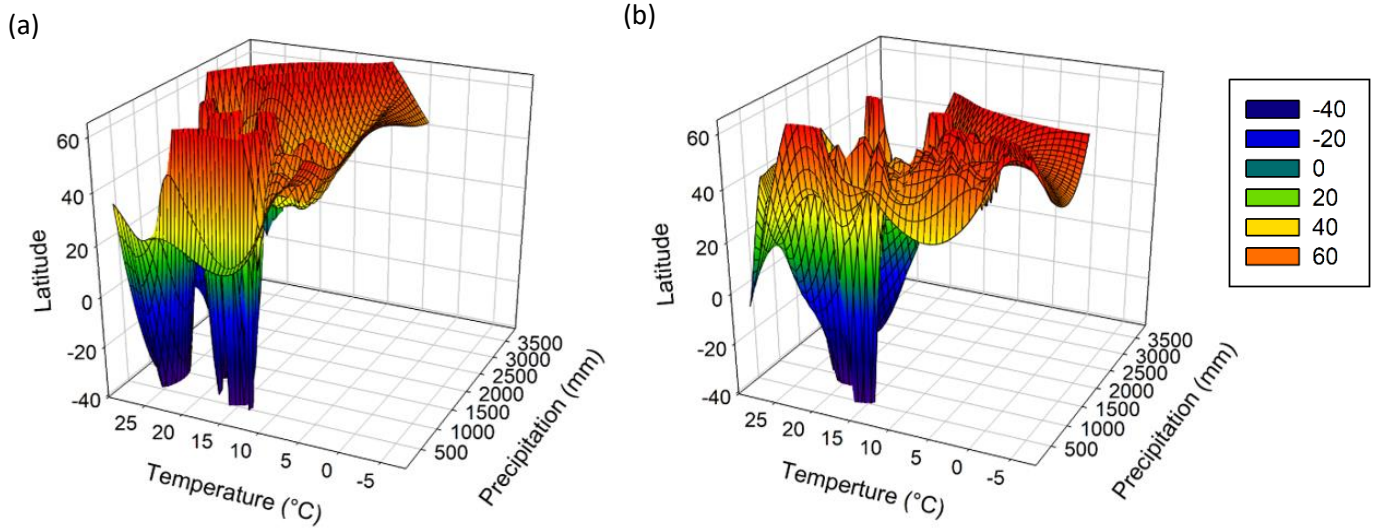

53  
54  
55  
56  
57  
58  
59  
60  
61  
62  
63  
64

**Figure S2: Comparing climatic parameters such as latitude, temperature & precipitation for each SARS-CoV-2 isolate (n=176).** (a-b) Color code for the mesh plot is mentioned in the box & is according to latitude from which each SARS-CoV-2 strain was isolated. Latitude, temperature & precipitation values for each virus isolate are mentioned in Table S2. Relationship between latitude, temperature & precipitation for each SARS-CoV-2 strain belonging to (a) G1 variant group (Strain ID: 1-58) & (b) G2 variant group (Strain ID: 59-176).

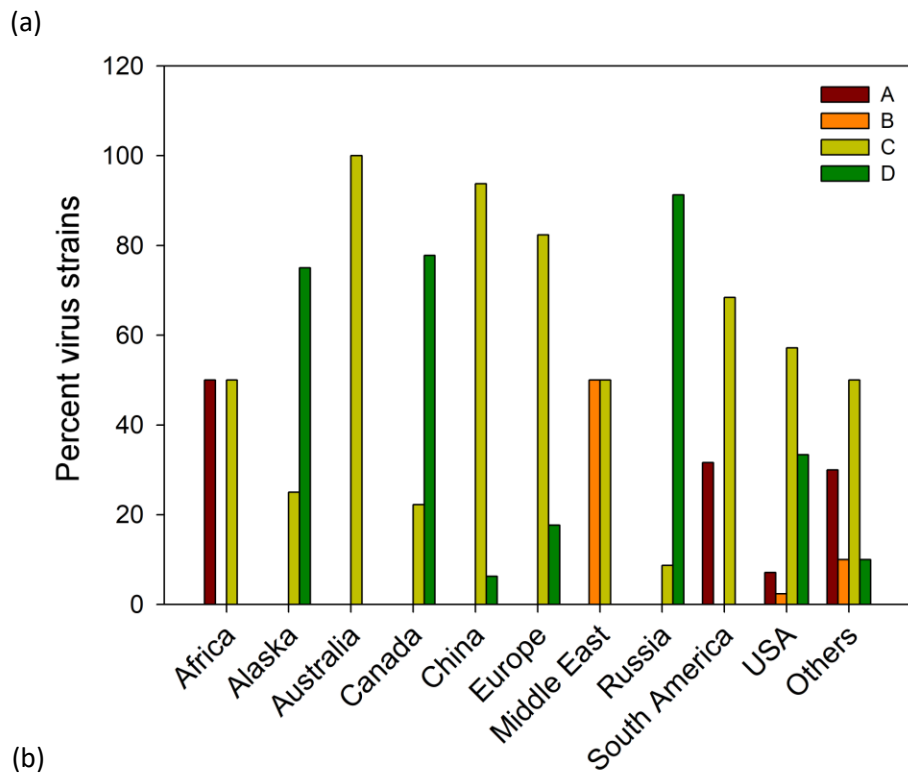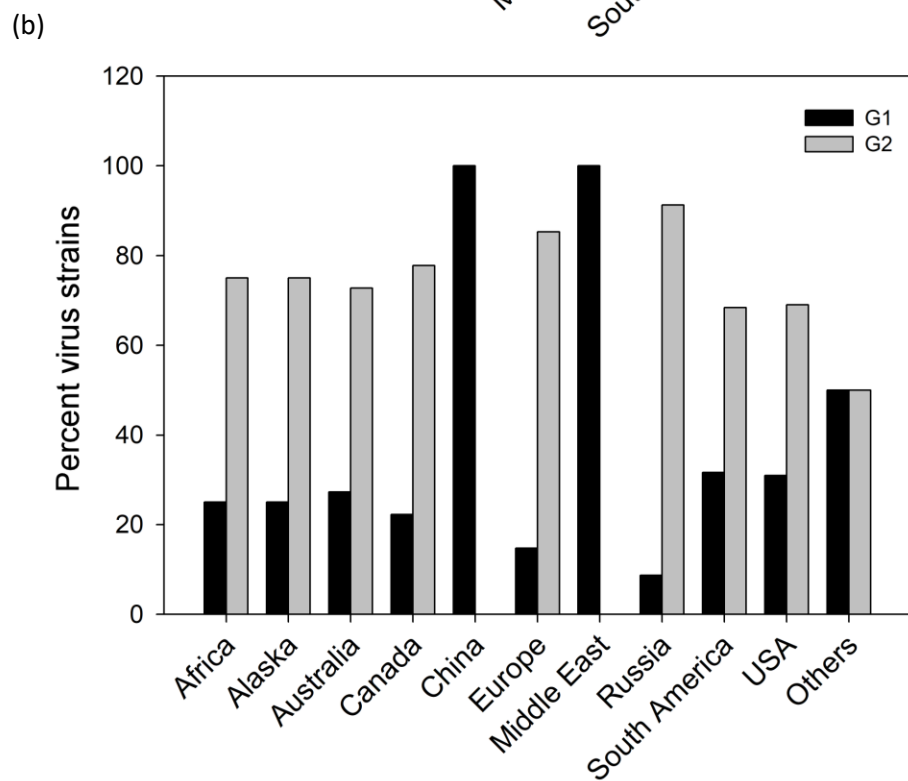

65

66 **Figure S3: Interpretation of Koppen's climate map country &/or continent wise:** Height of the bar  
 67 represents percentage of virus strains (a) across A, B, C, & D Koppen's climate & (b) distribution of virus  
 68 strains falling in G1 & G2 variant groups in major regions of the Earth. The G1 strains are abundant in  
 69 China having specifically C climate. In Russia G2 strains are present in abundance having specifically D  
 70 climate.

71 **Detailed interpretation & distribution of the strains on Koppen's map in major parts**  
72 **of the world (Figure4, Supplementary FigureS3)**

73 **China:** The entire southeast China has "*humid-subtropical*" (*Cfa*) climate also referred in  
74 the text as Wuhan-type climate. This climate grades into the cold deserts in the north &  
75 the land is separated from ocean in the south which isolates SARS-CoV-2 strains (n=16)  
76 in '*Cfa*' climate. All strains (15/16) from China belong to G1 group (Figure 4). One G1  
77 strain have appeared near to the C to D climate gradation near Beijing, suggesting G1  
78 population favours (Chi-square test,  $P < .001$ ) '*Cfa*' climate type of C climate.

79 **Europe:** The western coast of Europe consists of "*marine-temperate*" (*Cfb*) climate, a  
80 climate similar to Wuhan's climate i.e., '*Cfa*'. In UK, Spain, France, & Switzerland mainly  
81 '*Cfb*' climate persists, whereas Portugal has "*Hot-summer Mediterranean*" (*Csa*) climate.  
82 Towards west of Germany the '*Cfb*' climate dominates which grades into "*humid-*  
83 *continental*" (*Dfa-Dfb*) climate towards east which continues as a belt up to Japan. From  
84 the total strains (n=34), around 14.7% of G1 & 85.3% of G2 strains lie in Europe. All G1  
85 strains (n=5) of Europe belong to C climate, of which 60% belongs to *Cfb*, 40% to *Csa*.  
86 Among G2 strains (n=29), 79.3% of G2 strains belongs to C climate (65.5% *Cfa*, 10.3%  
87 *Csa*, & 3.4% *Cfc*) & 20.6% to *Dfb* climate type of D climate.

88 **Russia:** Majority (21/23) of strains (n=23) from Russia are present in the "*humid-*  
89 *continental*" (*Dfa-Dfb*) climate belt which begins from Germany & enters into the continent  
90 interior as a long (~8500 km) wide (~600-1700 km) belt, grading to (*Dwb-Dwc*) & tapering  
91 towards eastern side but continuing all along the southern borders of Russia up to  
92 Japan. From Russia, ~8.7% of total strains (n=23), belongs to G1 & 91.3% to G2. All G1

93 (2/23) strains are present in 'Dfb' climate, one strain is present near the gradation of C to  
94 D (Strain ID: 4) climate & another (Strain ID: 31) in the interior of the continent. Of G2  
95 strains, 91.3% of the strains are present in D climate (61.9% Dfb, 9.5% Dfa, 9.5% Dfc,  
96 4.7% Dwb, 4.7% Dwc) & 9.5% in Cfa of C climate, suggesting a strong preference (Chi-  
97 square test,  $P < .001$ ) of G2 strains towards D climate.

## 98 **North America:**

99 **USA:** Of all the continents North America USA has the most diverse climate, especially  
100 towards the western side<sup>1</sup>. The strains are mainly present in the eastern & western coasts  
101 of USA. The eastern coast of USA is one of the largest regions ( $\sim 2.4 \times 10^6$  Km<sup>2</sup>) of the  
102 world having "humid-subtropical" (Cfa) climate (Wuhan's climate). From the eastern  
103 coast, the strains enters into the continent interior through a long ( $\sim 3800$  km), wide belt  
104 ( $\sim 600$ - $1000$  km) lying in the northern extremities of the USA, extending roughly in NW-  
105 SE direction initially following borders between USA & Canada & entering to Canada from  
106 southern side. This belt belongs to "humid-continental" (Dfa-Dfb) climate; is similar to that  
107 of Russia (mentioned above). The strains in the western coast of USA are aligned roughly  
108 parallel to the coastline & shows bulging towards the south (Figure 4), the western coast  
109 of USA has mainly C climate, the bulged out portion has a bulged "Hot-summer  
110 mediterranean" (Csa) climate, which grades into "humid-continental" (Dfa-Dfb) towards  
111 its east. Between the western coast strains & eastern coast strains lies the cold desert,  
112 where SARS-CoV-2 strains are not present. In USA,  $\sim 31\%$  of strains ( $n=42$ ) belong to G1  
113 while  $\sim 69\%$  of the strains belongs to G2. Among G1 strains ( $n=13$ ),  $46.15\%$  of strains  
114 belong to C climate (23% Cfa, 23% Cfb),  $38.4\%$  to D climate (15.3% Dfa, 23.07% Dfb) &  
115  $7.6\%$  in both "tropical-monsoon" (Am) & "cold-desert" (BSk) climate. The G1 strains of D



116 & A zones mainly lie near boundaries of C & D climate around the eastern & western  
117 coasts (Figure 4). Within G2 strains (n =29), ~62% strains lie in C climate (55% Cfa, 6.8%  
118 Csb), ~31% in D climate (20.6% Dfa, 10.3% Dfb) & remaining 6.8% are equally distributed  
119 in tropical climate (3.4% Am, 3.4% Aw).

120 **Canada:** The strains of Canada (n=9) are mainly distributed along the western coasts &  
121 towards the southern side. The western coasts of Canada has “*humid-subtropical*” (Cfa)  
122 climate & south of Canada has “*humid-continental*” (Dfa-Dfb) climate, which is an extension  
123 of ‘Dfa-Dfb’ belt initiating from eastern side of USA near New York (mentioned above).  
124 22.2% of the strains belong to G1 & 77.8% to G2. Within G1 (n=2), 50% strains belong to  
125 the ‘Cfa’ & remaining to ‘Dfb’. Within G2 (n=7) variant group, ~14.2 % strains belong to  
126 “*marine-temperate*” (Cfb) & ~85.7% of strains belong to “*humid-continental*” (Dfb) climate.

127 **South America:** Majority (18/19) of South America’s strains (n=19) of strains are present  
128 in the eastern coast of South America, The G1 population is concentrated in the Sao  
129 Paulo & one G1 strain (Strain ID: 3) is visible in the western coast of Chile, in both the  
130 places C climate is dominant, mainly “*humid-subtropical*” (Cfa) & “*marine-temperate*”  
131 (Cfb). Other than these two places the C climate is not present in the entire South  
132 America. The position & extent of South America in the globe is unique in itself as it  
133 connects the C climate with all A (tropical) climate through land. Both G1 & G2 strains are  
134 present in the C climate, however G2 strains have shifted towards the “*tropical-savannah*”  
135 (Aw) climate towards north, this shift is not visible towards the desert climate in south.  
136 Around ~31.5% of G1 strains & 68.4% of G2 strains are present in South America. Within  
137 G1 (n=6), ~66% are present in the C climate (33.3% Cfa, 16.6% Cfb, 16.6% Csb), 33.3%  
138 in A climate (Aw). Within G2 (n=13), 69.23% of G2 strains are present in C climate

139 (46.15% Cfa, 23% Cfb), while 30.73% of the strains are present in A climate (23% Aw,  
140 7.6% Am).

141 **Africa:** Strains from Africa (n=4), are mainly (3/4) from G2 group. One G1 strains belongs  
142 to C climate (Cwb). Within G2, 66.66% of strains are present in A climate (Aw), & 33.33%  
143 in C climate (Csa).

144 **Australia:** All strains (n=11) from Australia are present either in the eastern or in the  
145 western coasts consisting of C climate. In the eastern coast the main climate is “*humid-*  
146 *subtropical*” (Cfa) & “*marine-temperate*” (Cfb) climate & western coast consists of “*Hot-*  
147 *summer mediterranean*” (Csa) climate of C climate. The rest of Australia has a desert  
148 climate. All strains from Australia are confined to this narrow belt of C climate. ~27% of  
149 the strains in Australia belong to G1 & ~73% of the strains belong to G2. Within G1 66.6%  
150 of strains are present in Cfa & 33.3% in Cfb. In G2, 50% of strains are present in Cfa,  
151 25% in Cfb & 25 % in Csa climate type.

152 **Japan:** Japan has mainly two climates i.e., “*marine-temperate*” (Cfb) towards south &  
153 “*humid-continental*” (Dfb) towards north. Strains (n=2), one G1 & another G2 strain from  
154 Japan belongs to Cfa climate.

155 **Middle East:** The entire Middle East consists of B climate (desert). A very small portion  
156 of Middle East consists of C climate in the regions around Turkey. All strains (n=4) of  
157 Middle East belong to G1 group, among which 50% belongs to C climate (25% Csa, &  
158 25% Csb) while the remaining are present in the “hot-desert” (BWh) climate.

159

160 **South Asia & South Asian Islands**

161 The G2 strains are present in India, Thailand & Vietnam, are mainly from “*tropical-*  
162 *savannah*” (*Aw*) climate, except strains from north-west India with a desert climate (BSh).

163 The G1 strains are present in Philippines & South Korea are having “*tropical-savannah*”  
164 (*Aw*) & “*humid-continental*” (*Dfa*) climate respectively. The South Korea strain lies in the  
165 transition of ‘*Cfa*’ climate (China) to ‘*Dfa*’ climate (South Korea). Most of the strains in the  
166 South Asia & South Asian Islands belong to G2. Of total, around 80% of G2 & 20% of G1  
167 strains are present in South Asia & South Asian Islands.

168

169

170

171
